# Supplementary material for: ‘I had no life. I was only existing’. Factors shaping the mental health and wellbeing of people experiencing long Covid: a qualitative study
Source: bioRxiv or medRxiv preprint supplement (doi:10.1101/2021.10.13.21264855), 2021-10-17
Supplement: Supplementary file [file media-1.pdf]

## Screening questions

### Thank you for your interest in taking part in our study on Social Distancing during Covid-19 and the impact of COVID-19 on health and wellbeing

We need to collect some additional information to understand whether or not you are eligible to take part in the interview

#### COVID-19 diagnosis status

- |                                                         |                                                               |
|---------------------------------------------------------|---------------------------------------------------------------|
| <input type="checkbox"/> Positive swab test             | <input type="checkbox"/> Tested negative for antibodies       |
| <input type="checkbox"/> Negative swab test             | <input type="checkbox"/> Not formally diagnosed but suspected |
| <input type="checkbox"/> Tested positive for antibodies | <input type="checkbox"/> Other, please specify_____           |

If you have not received a positive test for COVID-19 or antibodies, did you experience any of the following COVID-19 Symptoms (please tick all that apply)

- A continuous cough
- A high temperature
- Loss or change to taste/smell

Date that you were diagnosed or suspected that you had COVID-19

\_\_ / \_\_ / 2020

For how long after the onset of suspected/confirmed covid have you been experiencing symptoms?

- |                                            |                                                                 |
|--------------------------------------------|-----------------------------------------------------------------|
| <input type="checkbox"/> Less than 3 weeks | <input type="checkbox"/> 9-12 weeks                             |
| <input type="checkbox"/> 3-6 weeks         | <input type="checkbox"/> More than 12 weeks (please state_____) |
| <input type="checkbox"/> 6-9 weeks         |                                                                 |

Can you describe the long-term health problems that you are experiencing following confirmed or suspected COVID-19? (please tick all that apply)

- |                                                                  |                                                                          |
|------------------------------------------------------------------|--------------------------------------------------------------------------|
| <input type="checkbox"/> A cough                                 | <input type="checkbox"/> Headache                                        |
| <input type="checkbox"/> A high temperature/fever                | <input type="checkbox"/> Aches and pains                                 |
| <input type="checkbox"/> Loss or change to taste/smell           | <input type="checkbox"/> Shortness of breath                             |
| <input type="checkbox"/> Sore throat and difficulties swallowing | <input type="checkbox"/> Diarrhoea/vomiting                              |
| <input type="checkbox"/> Fatigue                                 | <input type="checkbox"/> Sleep difficulties                              |
| <input type="checkbox"/> Muscle pains/weakness                   | <input type="checkbox"/> New onset/poor control of diabetes/hypertension |
| <input type="checkbox"/> Inability to concentrate                | <input type="checkbox"/> Skin rashes                                     |
| <input type="checkbox"/> Memory lapses                           | <input type="checkbox"/> Chest pains                                     |

Changes in mood, anxiety or depression

Palpitations

Thromboembolic conditions

Other, please specify \_\_\_\_\_

**Many thanks again for your time**
